# Supplementary material
Source: PubMed Central journal article supplement (PMC1559456)
Supplement: bj3980423add.pdf [file bj3980423add.pdf]

# Targeted deletion of Gpbar1 protects mice from cholesterol gallstone formation

Galya Vassileva<sup>\*1</sup>, Andrei Golovko\*, Lisa Markowitz\*, Susan J Abbondanzo\*, Ming Zeng\*, Shijun Yang\*, Lizbeth Hoos†, Glen Tetzloff†, Diane Levitan\*, Nicholas J Murgolo\*, Kevin Keane‡, Harry R Davis Jr†, Joseph Hedrick\*, and Eric L Gustafson\*

\*Department of Discovery Technologies

†Department of Cardiovascular/Metabolic Diseases

‡Department of Drug Safety & Metabolism

Schering-Plough Research Institute, Kenilworth, NJ 07033

<sup>1</sup>To whom correspondence should be addressed (email: [galya.vassileva@spcorp.com](mailto:galya.vassileva@spcorp.com))

## SUPPLEMENTAL ONLINE DATA

**Figure S1.** Body weights of mice on lithogenic (L) diet. Individual values were measured from 22 mice per group at baseline and after 9 weeks on lithogenic diet. Error bars represent S.D. \* $p < 0.05$  when compared to baseline BW.

**Figure S2.** Gene expression analysis. Real-time quantitative PCR analysis was performed on mRNA from livers of Gpbar1<sup>-/-</sup> and Gpbar1<sup>+/+</sup> littermate mice. **A.** Cholesterol, phospholipids, and fatty acids synthesis and metabolism genes. **B.** Canalicular bile secretion genes. Error bars represent S.D. Abca1, ATP-binding cassette, sub-family A, member 1; Hmgcr, 3-hydroxy-3-methylglutaryl-Coenzyme A reductase; Ldlr, low-density lipoprotein receptor; Scarb1, scavenger receptor class B, member 1; Fasn, fatty acid synthase; Lpl, lipoprotein lipase; Pctp, phosphatidylcholine transfer protein; Abcb4, ATP-binding cassette, sub-family B (MDR/TAP), member 4; Abcg5, ATP-binding cassette, sub-family G (WHITE), member 5; Abcg8, ATP-binding cassette, sub-family G (WHITE), member 8; Abcb11, ATP-binding cassette, sub-family B (MDR/TAP), member 11.

**Table S1.** Primers sequences for the genes involved in the synthesis and metabolism of bile acids, cholesterol, phospholipids, and fatty acids, and in the negative feedback regulation of Cyp7a1.

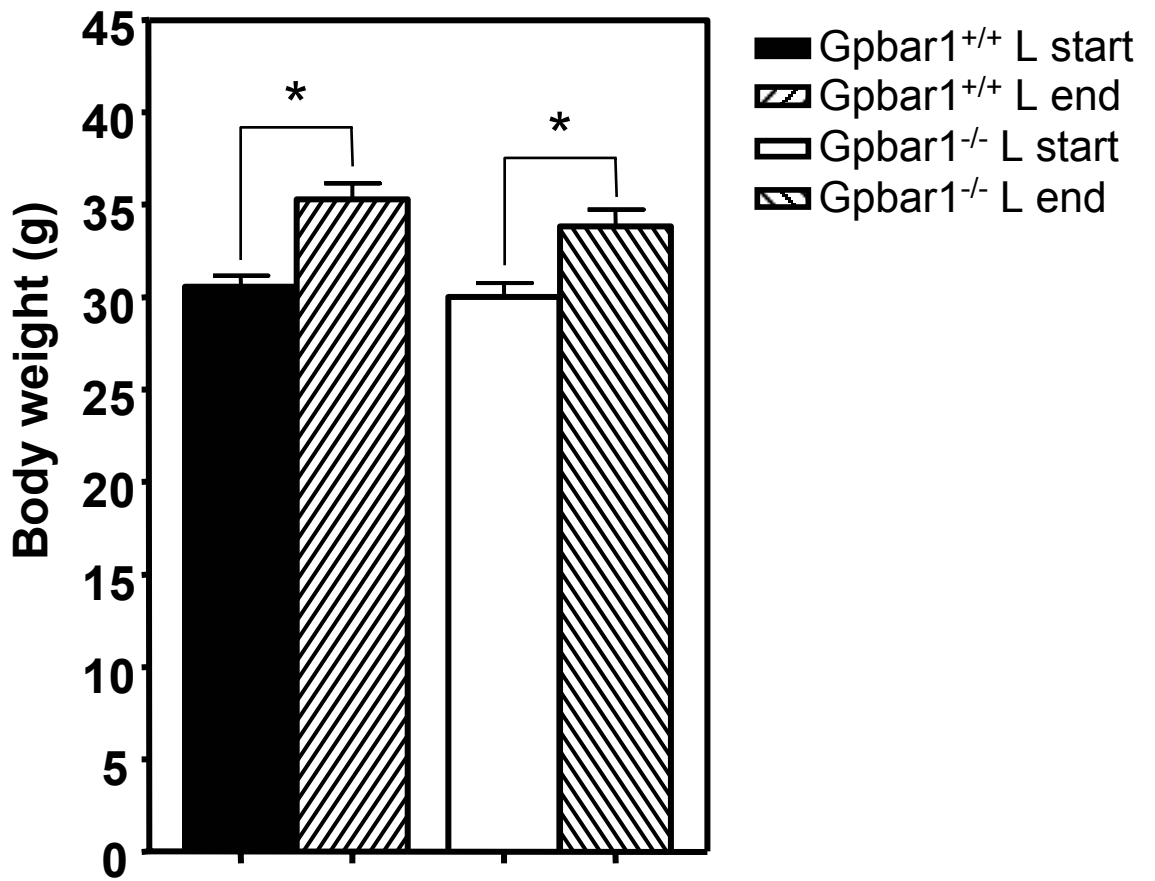

Figure S1

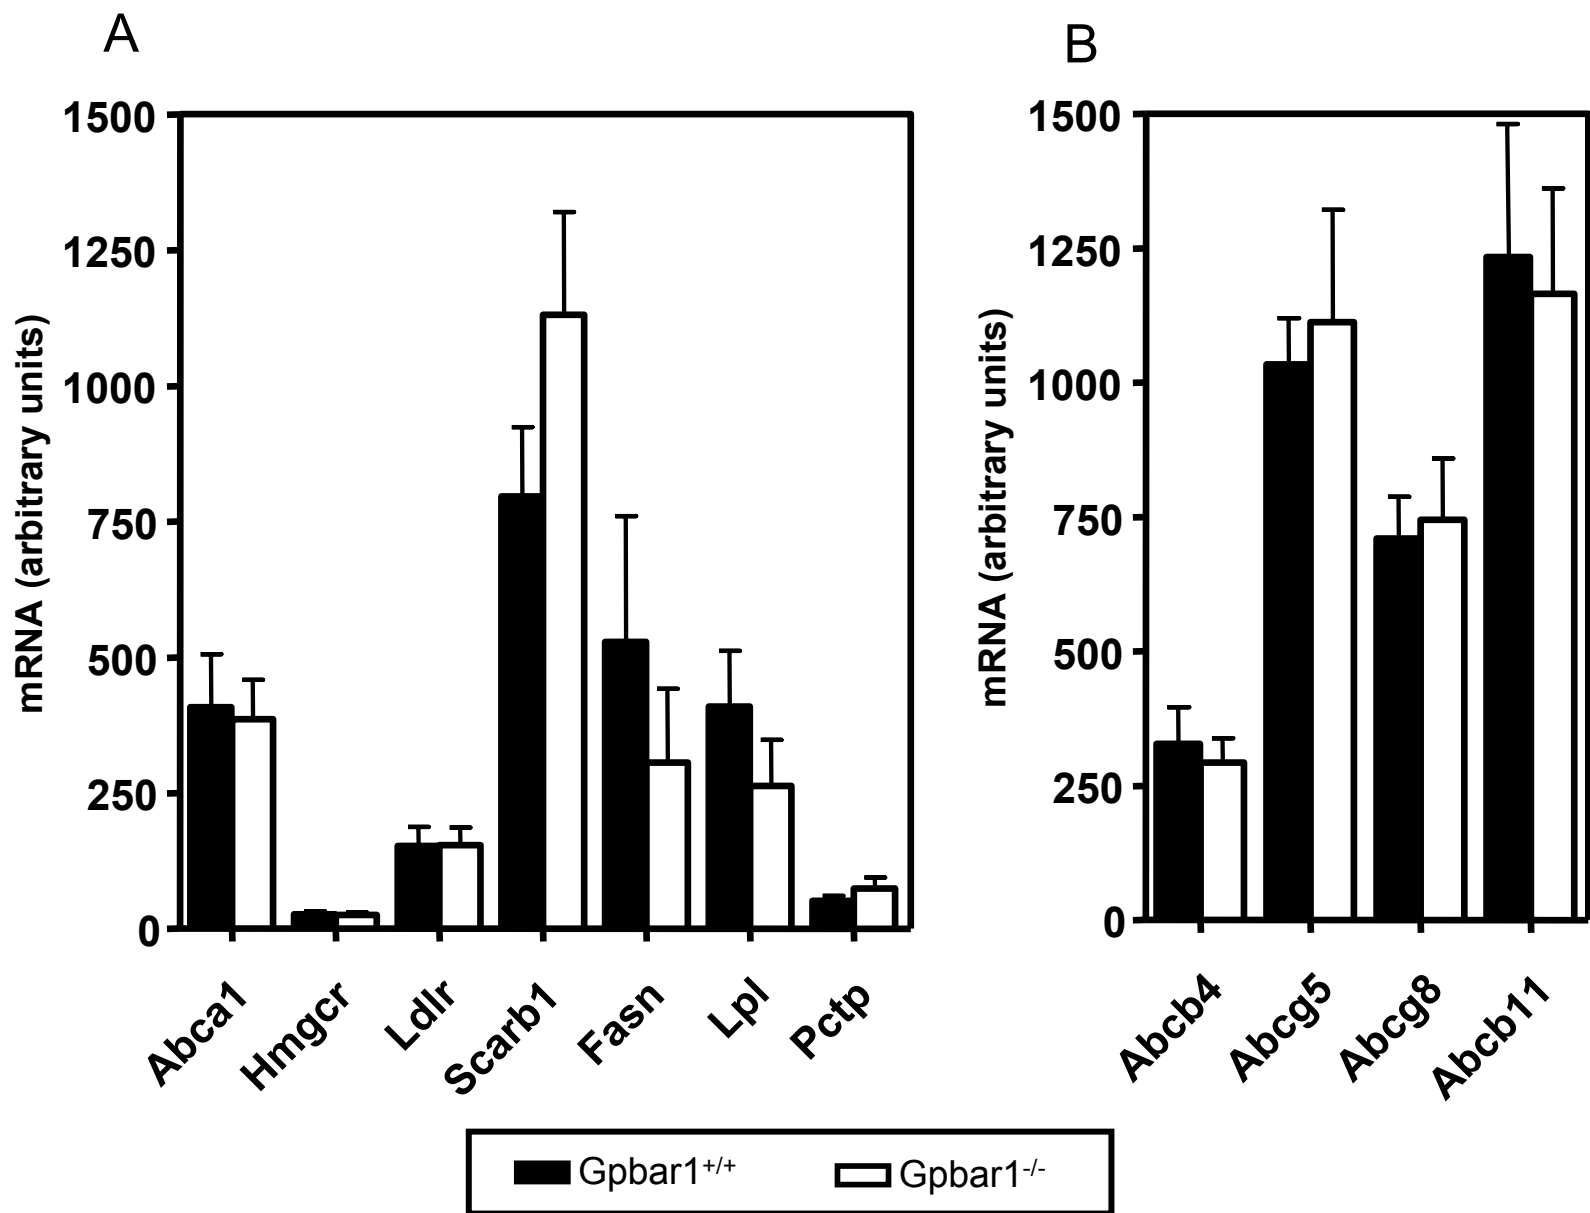

Figure S2

| Gene    | Sequence                          | Genebank Acc# |
|---------|-----------------------------------|---------------|
| Cyp7a1  | FP: 5-CCATGATGCAAAACCTCCAAT-3'    | L23754        |
|         | RP: 5-ACCCAGACAGCGCTCTTTGA-3'     |               |
|         | probe: 5'-TGAGACCTCCGGGCCTTCCT-3' |               |
| Cyp8b1  | FP: 5-TAGCCCTCTTTCCTCCACTCATA-3'  | NM_010012     |
|         | RP: 5-GAACCGATCGAACCTAAATTCCT-3'  |               |
| Cyp27a1 | FP: 5-CTGCGTCAGGCTTTGAAACA-3'     | NM_024264     |
|         | RP: 5-TCGTTTAAGGCATCCGTGTAGA-3'   |               |
| FXR     | FP: 5-CCACCGGCTGTCAGGATTT-3'      | NM_009108     |
|         | RP: 5-GCATACCTTTAGCTGGCTTCACA-3'  |               |
| SHP     | FP: 5-GCCTGGCCCGAATCCT-3'         | L76567        |
|         | RP: 5-GGGTGCCTGGAATGTTCTTG-3'     |               |
| FTF     | FP: 5-CGGTTTGCAACTACCCACAA-3'     | NM_030676     |
|         | RP: 5-CGGGTAGCCGAAGAAGTAGCT-3'    |               |
| PXR     | FP: 5-ACATTGAGTGTAGTCGGCCATATC-3' | NM_010936     |
|         | RP: 5-AGGACGGCCATGATCTTCAG-3'     |               |
| Ntcp    | FP: 5-CACCGGGCCACAGAACT-3'        | NM_011387     |
|         | RP: 5-TGATGAGCAGCAACATAACTACCA-3' |               |
| Oatp1   | FP: 5-CTCCCCGCAAGTCTTCATTCTAA-3'  | AF148218      |
|         | RP: 5-TGGATGTCGCCAGGGAAAT-3'      |               |
| Oatp2   | FP: 5-TGAAGCTCACTGCGAAGGAA-3'     | NM_030687     |
|         | RP: 5-TCCATCATTCTGCATCGTAGGA-3'   |               |
| LXR     | FP: 5-GTTCCACGGATGCTAATGAA-3'     | NM_013839     |
|         | RP: 5-TGAATGGACGCTGCTCAAAG-3'     |               |
| Abca1   | FP: 5-TCCTCATCCTCGTCATTCAA-3'     | NM_013454     |
|         | GGACTTGGTAGGACGGAACCT-3'          |               |
| Hmgcr   | FP: 5-GGCAGTCAGTGGGAACCTATTGC-3'  | BC019782      |
|         | RP: 5-CCTCGTCCTTCGATCCAGTTT-3'    |               |
| Ldlr    | FP: 5-CATAGGCTATCTGCTCTTCACCAA-3' | NM_010700     |
|         | RP: 5-GCGGTCCAGGGTTCATCTTC-3'     |               |
| Scarb1  | FP: 5-CACGGCGTCCAGAATTT-3'        | NM_016741     |
|         | RP: 5-GCTGAGTCCGTTCCATTTGTC-3'    |               |
| Fasn    | FP: 5-CCTGGATAGCATTCCGAACCT-3'    | NM_007988     |
|         | RP: 5-AGCACATCTCGAAGGCTACACA-3'   |               |
| Lpl     | FP: 5-CCAGGATGCAACATTGGAGAA-3'    | NM_008509     |
|         | RP: 5-CCACGTCTCCGAGTCTCTCT-3'     |               |
| Pctp    | FP: 5-TGGCATACTGGGAAGTGAAGTAC-3'  | NM_008796     |
|         | RP: 5-GGCGGGTGTAGACGTAATCTC-3'    |               |
| Abcb4   | FP: 5-GGATCTTGAGGCAGCGAGAA-3'     | NM_008830     |
|         | RP: 5-GGTTGCTGATGCTGCCTAGTT-3'    |               |
| Abcg5   | FP: 5-CCCATACACCGGCATGCT-3'       | NM_031884     |
|         | RP: 5-GGTCGCTGACGGCTCTCA-3'       |               |
| Abcg8   | FP: 5-CCGTCGTCAGATTTCCAATGA-3'    | NM_026180     |
|         | RP: 5-GGCTTCCGACCCATGAATG-3'      |               |
| Abcb11  | FP: 5-AAGCTGCCAAGGATGCTAATG-3'    | NM_021022     |
|         | RP: 5-CTCCAAGTGGGTGTCAAATTGC-3'   |               |
| Klb     | FP: 5-TGCCACTGGGCAGAACCT-3'       | NM_031180     |
|         | RP: 5-GCTCGGCTGCCTTCCA-3'         |               |

Table S1
